# Supplementary material for: Late Middle Pleistocene Levallois stone-tool technology in southwest China
Source: Springer Nature journal article supplement (doi:10.1038/s41586-018-0710-1), 2018-11-13
Supplement: 41586_2018_710_MOESM2_ESM.pdf [file 41586_2018_710_MOESM2_ESM.pdf]

## Reporting Summary

Nature Research wishes to improve the reproducibility of the work that we publish. This form provides structure for consistency and transparency in reporting. For further information on Nature Research policies, see [Authors & Referees](#) and the [Editorial Policy Checklist](#).

### Statistical parameters

When statistical analyses are reported, confirm that the following items are present in the relevant location (e.g. figure legend, table legend, main text, or Methods section).

n/a Confirmed

- The exact sample size ( $n$ ) for each experimental group/condition, given as a discrete number and unit of measurement
- An indication of whether measurements were taken from distinct samples or whether the same sample was measured repeatedly
- The statistical test(s) used AND whether they are one- or two-sided  
*Only common tests should be described solely by name; describe more complex techniques in the Methods section.*
- A description of all covariates tested
- A description of any assumptions or corrections, such as tests of normality and adjustment for multiple comparisons
- A full description of the statistics including central tendency (e.g. means) or other basic estimates (e.g. regression coefficient) AND variation (e.g. standard deviation) or associated estimates of uncertainty (e.g. confidence intervals)
- For null hypothesis testing, the test statistic (e.g.  $F$ ,  $t$ ,  $r$ ) with confidence intervals, effect sizes, degrees of freedom and  $P$  value noted  
*Give  $P$  values as exact values whenever suitable.*
- For Bayesian analysis, information on the choice of priors and Markov chain Monte Carlo settings
- For hierarchical and complex designs, identification of the appropriate level for tests and full reporting of outcomes
- Estimates of effect sizes (e.g. Cohen's  $d$ , Pearson's  $r$ ), indicating how they were calculated
- Clearly defined error bars  
*State explicitly what error bars represent (e.g. SD, SE, CI)*

*Our web collection on [statistics for biologists](#) may be useful.*

### Software and code

Policy information about [availability of computer code](#)

Data collection Analyst (Risoe OSL/TL customised software for OSL analysis), Excel

Data analysis Analyst (Risoe OSL/TL customised software for OSL analysis), Excel, R-studio (R code available in Github, link provided in ms)

For manuscripts utilizing custom algorithms or software that are central to the research but not yet described in published literature, software must be made available to editors/reviewers upon request. We strongly encourage code deposition in a community repository (e.g. GitHub). See the Nature Research [guidelines for submitting code & software](#) for further information.

### Data

Policy information about [availability of data](#)

All manuscripts must include a [data availability statement](#). This statement should provide the following information, where applicable:

- Accession codes, unique identifiers, or web links for publicly available datasets
- A list of figures that have associated raw data
- A description of any restrictions on data availability

All custom R scripts used to produce the results presented here is available online at <http://doi.org/10.17605/OSF.IO/ERNTJ>. All other relevant data are available from the corresponding authors on request.

## Field-specific reporting

Please select the best fit for your research. If you are not sure, read the appropriate sections before making your selection.

Life sciences  Behavioural & social sciences  Ecological, evolutionary & environmental sciences

For a reference copy of the document with all sections, see [nature.com/authors/policies/ReportingSummary-flat.pdf](https://www.nature.com/authors/policies/ReportingSummary-flat.pdf)

## Ecological, evolutionary & environmental sciences study design

All studies must disclose on these points even when the disclosure is negative.

|                                   |                                                                                                                                                                                 |
|-----------------------------------|---------------------------------------------------------------------------------------------------------------------------------------------------------------------------------|
| Study description                 | Chronology and lithic study of a Paleolithic site in southwest China                                                                                                            |
| Research sample                   | Samples include 13 sedimentary samples for OSL dating, and over 2000 stone tools for lithic analysis.                                                                           |
| Sampling strategy                 | The OSL samples were taken to bracket the cultural layers. The lithic assemblage was studied as a whole.                                                                        |
| Data collection                   | OSL and lithic data were collect and analysed by H.Y. and co-authors                                                                                                            |
| Timing and spatial scale          | The data collection stars from 2015 until 2018. This is part of the PhD project of H.Y.                                                                                         |
| Data exclusions                   | All data are analysed and contributed to final conclusion.                                                                                                                      |
| Reproducibility                   | OSL dating procedure was validated using a series of laboratory-controlled experiments, such as dose recovery, preheat plateau and various well-established rejection criteria. |
| Randomization                     | N.A.                                                                                                                                                                            |
| Blinding                          | N.A.                                                                                                                                                                            |
| Did the study involve field work? | <input checked="" type="checkbox"/> Yes <input type="checkbox"/> No                                                                                                             |

## Field work, collection and transport

|                          |                                                                                                                                                                                                                                            |
|--------------------------|--------------------------------------------------------------------------------------------------------------------------------------------------------------------------------------------------------------------------------------------|
| Field conditions         | Two field trips were conducted in the Guizhou province, China, one in summer 2015 and the other in winter 2018.                                                                                                                            |
| Location                 | Guanyindong Cave (26°51'26"N, 105°58'7"E, 1464 m a.s.l.)                                                                                                                                                                                   |
| Access and import/export | We were working under the permission of the Bureau of Cultural Relics Protection, Qianxi County, Bijie, Guizhou Province, China                                                                                                            |
| Disturbance              | This site has been excavated for ~40 years, so only residual profiles were available, and we did not conduct further excavation but just took OSL samples for dating. The opened profile was sealed for further protection after sampling. |

## Reporting for specific materials, systems and methods

### Materials & experimental systems

| n/a                                 | Involvement in the study                             |
|-------------------------------------|------------------------------------------------------|
| <input checked="" type="checkbox"/> | <input type="checkbox"/> Unique biological materials |
| <input checked="" type="checkbox"/> | <input type="checkbox"/> Antibodies                  |
| <input checked="" type="checkbox"/> | <input type="checkbox"/> Eukaryotic cell lines       |
| <input checked="" type="checkbox"/> | <input type="checkbox"/> Palaeontology               |
| <input checked="" type="checkbox"/> | <input type="checkbox"/> Animals and other organisms |
| <input checked="" type="checkbox"/> | <input type="checkbox"/> Human research participants |

### Methods

| n/a                                 | Involvement in the study                        |
|-------------------------------------|-------------------------------------------------|
| <input checked="" type="checkbox"/> | <input type="checkbox"/> ChIP-seq               |
| <input checked="" type="checkbox"/> | <input type="checkbox"/> Flow cytometry         |
| <input checked="" type="checkbox"/> | <input type="checkbox"/> MRI-based neuroimaging |
